# Supplementary material
Source: PubMed Central journal article supplement (PMC4808327)
Supplement: NIHMS734607-supplement-3.pdf [file NIHMS734607-supplement-3.pdf]

E-Table 3. Results of the Age-Adjusted Cox Regression of the Effect of Statins on Cataract Progression:  
Hazard Ratios and 95% Confidence Limits using Matched Statin-Use Propensity Scores

|                                                                                                                          | N    | Without accounting for competing risk of death |                   | Accounting for competing risk of death |                   |
|--------------------------------------------------------------------------------------------------------------------------|------|------------------------------------------------|-------------------|----------------------------------------|-------------------|
|                                                                                                                          |      | HR                                             | 95% CI            | HR                                     | 95% CI            |
| <b>Cataract surgery incidence</b>                                                                                        |      |                                                |                   |                                        |                   |
| All participants                                                                                                         | 1808 | <b>2.15</b>                                    | <b>1.08-4.32</b>  | 2.02                                   | 0.99-4.09         |
| Stratified by sex:                                                                                                       |      |                                                |                   |                                        |                   |
| Females                                                                                                                  | 1002 | <b>3.51</b>                                    | <b>1.35-9.09</b>  | <b>3.35</b>                            | <b>1.29-8.71</b>  |
| Males                                                                                                                    | 806  | 1.24                                           | 0.45-3.43         | 1.14                                   | 0.40-3.27         |
| Stratified by age group:                                                                                                 |      |                                                |                   |                                        |                   |
| Age < 75 years                                                                                                           | 1177 | <b>3.65</b>                                    | <b>1.28-10.34</b> | <b>3.47</b>                            | <b>1.11-10.86</b> |
| Age ≥ 75 years                                                                                                           | 631  | 1.31                                           | 0.52-3.34         | 1.19                                   | 0.49-2.87         |
| <b>Progression of cortical lens opacity</b>                                                                              |      |                                                |                   |                                        |                   |
| All participants                                                                                                         | 1708 | <b>1.70</b>                                    | <b>1.05-2.76</b>  | 1.56                                   | 0.96-2.53         |
| Stratified by sex:                                                                                                       |      |                                                |                   |                                        |                   |
| Females                                                                                                                  | 944  | <b>2.17</b>                                    | <b>1.10-4.31</b>  | <b>2.03</b>                            | <b>1.06-3.91</b>  |
| Males                                                                                                                    | 764  | 1.34                                           | 0.68-2.65         | 1.28                                   | 0.63-2.59         |
| Stratified by age group:                                                                                                 |      |                                                |                   |                                        |                   |
| Age < 75 years                                                                                                           | 1121 | 1.80                                           | 0.93-3.48         | 1.54                                   | 0.80-2.96         |
| Age ≥ 75 years                                                                                                           | 587  | 1.65                                           | 0.80-3.41         | 1.58                                   | 0.76-3.26         |
| <b>Progression of posterior subcapsular lens opacity</b>                                                                 |      |                                                |                   |                                        |                   |
| All participants                                                                                                         | 1746 | <b>2.18</b>                                    | <b>1.26-3.77</b>  | <b>1.98</b>                            | <b>1.14-3.44</b>  |
| Stratified by sex:                                                                                                       |      |                                                |                   |                                        |                   |
| Females                                                                                                                  | 970  | <b>3.50</b>                                    | <b>1.63-7.53</b>  | <b>3.04</b>                            | <b>1.45-6.36</b>  |
| Males                                                                                                                    | 776  | 1.36                                           | 0.62-2.97         | 1.35                                   | 0.60-3.07         |
| Stratified by age group:                                                                                                 |      |                                                |                   |                                        |                   |
| Age < 75 years                                                                                                           | 1139 | <b>2.27</b>                                    | <b>1.05-4.93</b>  | 1.96                                   | 0.89-4.29         |
| Age ≥ 75 years                                                                                                           | 607  | 2.09                                           | 0.94-4.62         | 1.89                                   | 0.86-4.16         |
| HR = hazard ratio; CI = confidence interval. Boldface hazard ratios and confidence intervals are significant (P < 0.05). |      |                                                |                   |                                        |                   |
